# Supplementary material for: Apparent and partial ideal molar isentropic compressibilities of binary liquid mixtures Electronic Supplementary Information available. See http://www.rsc.org/suppdata/cp/b1/b104974g/
Source: Royal Society of Chemistry journal article supplement (doi:10.1039/b104974g), 2001-09-21
Supplement: list_of_symbols.doc [file list_of_symbols.doc]

***Symbols employed in the text.***

*S*  The coefficient of isentropic compressibility

V Volume

p Pressure

u ultrasonic speed

- density

KS.m. molar isentropic compressibility

Vm molar volume

Mm molar mass

KT  isothermal compressibility

Ep isobaric expansivity

Cp isobaric heat capacity

KT.A*  molar isothermal compressibility of pure component A

KT.mid ideal molar isothermal compressibility

mixKS.mid Ideal change in the isemtropic molar compressibility

xA  Mole fraction of component A

KT.A Partial molar isothermal compressibility of component A.

(KS.A) Apparent molar isentropic compressibility of component A.

KS.mE Excess molar isentropic compressibilitiy

aW. bW, cW Parameters of the four segment cmomposition model.

Q An extensive thermodynamic property
